# Supplementary material for: Synthesis of Novel Shape Memory Thermoplastic Polyurethanes (SMTPUs) from Bio-Based Materials for Application in 3D/4D Printing Filaments
Source: MDPI journal article supplement (doi:10.3390/ma16031072), 2023-01-26
Supplement: s1 [file s1]

# Synthesis of Novel Shape Memory Thermoplastic Polyurethanes (SMTPUs) from Bio-based Materials for Application in 4D Printing Filaments

Yang-Sook Jung<sup>1,2</sup>, Sunhee Lee<sup>3</sup>, Jaehyeung Park <sup>2\*</sup> and Eun-Joo Shin<sup>1\*</sup>

<sup>1</sup> Department of Organic Materials and Polymer Engineering, Dong-A University, Busan 49315, Republic of Korea

<sup>2</sup> Department of Bio-fibers and Materials Science, Kyungpook National University, Daegu 41566, Republic of Korea

<sup>3</sup> Department of Fashion Design, Dong-A University, Busan 49315, Republic of Korea

\* Correspondence: parkj@knu.ac.kr (J.P.); sejoo6313@dau.ac.kr (E.J.S.); Tel.: +82-539505738 (J.P.); +82-512007343 (E.J.S.)

## Supporting Information

Table S1. Photographic images of the loading set-up and the resulting products during the preliminary test before 3D printing.

| Sample            | 190 °C                                                                              |                                                                                     | 200 °C                                                                              |                                                                                     | 210 °C                                                                              |                                                                                     | 220 °C                                                                               |                                                                                       | 230 °C                                                                                |                                                                                       |
|-------------------|-------------------------------------------------------------------------------------|-------------------------------------------------------------------------------------|-------------------------------------------------------------------------------------|-------------------------------------------------------------------------------------|-------------------------------------------------------------------------------------|-------------------------------------------------------------------------------------|--------------------------------------------------------------------------------------|---------------------------------------------------------------------------------------|---------------------------------------------------------------------------------------|---------------------------------------------------------------------------------------|
|                   | loading                                                                             | product                                                                             | loading                                                                             | product                                                                             | loading                                                                             | product                                                                             | loading                                                                              | product                                                                               | loading                                                                               | product                                                                               |
| MP<br>1/2.22/1.22 |  |  |  |  |  |  |  |  |  |  |
| MP<br>1/1.90/0.90 |  |  |  |  |  |  |  |  |  |  |
| MP<br>1/1.50/0.50 |  |  |  |  |  |  |  |  |  |  |

Table S2. Images of the auxetic re-entrant shape memory thermoplastic polyurethane samples.

| Sample                  | MP 1/2.22/1.22                                                                      | MP 1/1.90/0.90                                                                      | MP 1/1.50/0.50                                                                        |
|-------------------------|-------------------------------------------------------------------------------------|-------------------------------------------------------------------------------------|---------------------------------------------------------------------------------------|
| Image                   | 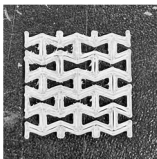 |  |  |
| Nozzle Temperature (°C) | 210                                                                                 | 230                                                                                 | 230                                                                                   |

|            |      |      |      |
|------------|------|------|------|
| Weight (g) | 0.70 | 0.74 | 0.67 |
|------------|------|------|------|
